## **PERCEIVED STIGMATIZATION, SOCIODEMOGRAPHIC FACTORS, AND MENTAL HEALTH HELP-SEEKING BEHAVIORS AMONG PSYCHIATRIC OUTPATIENTS ATTENDING A PSYCHIATRIC HOSPITAL IN LAGOS, NIGERIA.**

<sup>1</sup>Ogueji, Ifeanyichukwu Anthony, <sup>2</sup>Ojo, Taiye Emmanuel, and <sup>3</sup>Gidado, Taiwo Nurudeen.

<sup>1</sup>Department of Psychology, University of Ibadan, Ibadan, Oyo state, Nigeria.

<sup>2</sup>Department of Psychology, Lagos State University, Lagos, Lagos state, Nigeria.

<sup>3</sup>Department of Psychology, University of Lagos, Lagos, Lagos state, Nigeria.

**Corresponding Author:** Ogueji, Ifeanyichukwu Anthony. Department of Psychology, University of Ibadan, Ibadan, Oyo state, Nigeria.

+2348162774642 or ifeanyiogueji21@gmail.com.

### **ABSTRACT**

**Objective:** Among the general population of patients with mental illness is a sub-population (psychiatric outpatients) who often encounter limited mental health help-seeking behaviors due to many unknown factors. Therefore, the aim of this study was to explore some predictors of mental health help-seeking behaviors among psychiatric outpatients.

**Design:** This cross-sectional study accidentally recruited 42 psychiatric outpatients receiving treatment at the Federal Neuropsychiatric Hospital, Yaba, Lagos state, Nigeria. Their mean age was  $27.03 \pm 7.05$  years. Data was collected using standardized questionnaire, and analyzed using SPSS (v. 22). Statistical significance set at  $p < .05$ .

**Results:** The first finding showed no significant relationship between perceived stigmatization and mental health help-seeking behaviors. Second showed that gender had no significant influence on mental health help-seeking behaviors. Third showed that age had no significant relationship with mental health help-seeking behaviors. Last finding submitted that clinical diagnosis, religious affiliation, marital status, and educational qualification had a significant joint prediction on mental health help-seeking behaviour, with 28% variance explained. Only religious affiliation had a significant independent prediction.

**Conclusion:** Our findings have practical implications for enhancing mental health help-seeking behaviors and strengthening an interdisciplinary approach to mental health care for psychiatric outpatients.

**Keywords:** Perceived stigmatization, Social factors, Mental health help-seeking behavior, Psychiatric outpatients.

## INTRODUCTION

Psychiatric outpatients are a subpopulation in the general population of patients with psychiatric illness. This subpopulation is often limited from seeking mental health help, unlike their inpatient counterparts who are less limited because of the treatment they receive within the health facility setting (Chaudhry, et al. 2017; Coker, et al 2019). The extent of mental health help-seeking behavior of this subpopulation remains among the crucial factors explaining their mental health (Kodama, et al. 2016; Magaard, et al. 2017; Khiari, et al. 2019; Shi, et al. 2020). In addition, mental health help-seeking behavior has been found to be linked with psychiatric comorbidities in this subpopulation (Magaard, et al. 2017; Dongxin, et al. 2019). These, therefore, makes researching into the predictors of mental health help-seeking behavior among the psychiatric outpatients worthy of attention from mental health researchers.

The mental health help-seeking behaviors of psychiatric outpatients remain restricted despite that related studies have found factors such as willingness to seek professional help for a serious illness, feeling comfortable talking about personal problems with professionals, encouragement and pressure to seek help by family or friends, mental health literacy, self-concept, and employment status, as factors predicting mental health help-seeking behaviors among psychiatric outpatients (Mojtabai, et al. 2016; Bitman-Heinrichs, 2017; Wigand, et al. 2019; Egwuonwu, et al. 2019). These submissions from related studies, therefore, creates a paucity of information on the predictive roles of perceived stigmatization and sociodemographic factors on mental health help-seeking behaviors among the population of interest.

Therefore, the aim of the current study was to investigate the predictive impacts of perceived stigmatization, and sociodemographic factors on mental health help-seeking behaviors among psychiatric outpatients. Perceived stigmatization and sociodemographic factors are very worthy of research attention and this is given the fact that these variables are recurrent in the lived experiences of psychiatric outpatients (Makanjuola, et al. 2016; Knack, et al. 2017; Heydari, et al. 2019). However, there are very limited data to validate the impacts of these variables on the help-seeking behaviors of our population of interest.

For instance, some studies have found that if faced with mental health troubles, people may conceal the mental health problems within themselves rather than seek professional help, for the purpose of avoiding anticipated stigmatization or rejection from the society (Adewuya & Makanjuola, 2008; Sheikh, et al. 2015; Mantovani, et al. 2017; Ogueji & Constantine-Simms 2019; Ogueji & Okoloba, 2020). In another finding, social factors such as educational qualification, gender, and age has been found to be associated with help-seeking for mental illness (Mackenzie, et al. 2006; Adewuya & Makanjuola 2008; Oladipo & Blogun 2010; Wendt & Shafer, 2015; Kumuyi, 2017; Olarenwaju, et al. 2019). However, most of these findings were often limited in their applicability to psychiatric outpatients. Additionally, most of these studies suggested the need for extending their research to sub-population of psychiatric patients such as the psychiatric outpatients.

## **Theoretical Underpinning and Application**

### **Threats-to-Self-Esteem Model**

Fisher, et al. (1983) argued that mental health help-seeking is influenced by the extent to which the help-seekers perceive the help situation as a threat to their ego. Thus, if the help-seeker perceives the help situation as a threat to their ego, they are less likely to seek help. For instance, if people consider that they will be stigmatized against when they seek help, they are likely not to attempt help-seeking or they are likely to try other route of help-seeking that does not bring stigmatization. Similarly, if people consider social factors that are present during help-seeking to be a threat to their ego, they are likely not to attempt help-seeking or they are likely to try other route of help-seeking. In essence, help-seeking according to the threats-to-self-esteem model, is determined by the extent to which the help-seeker considers the help a threat to his/her ego.

### **Research Questions**

Given the overall aim of this study, and the threats-to-self-esteem model which is the theoretical framework for this study, the following research questions were thus asked:

1. What is the influence of perceived stigmatization on mental health help-seeking behaviors among mental health outpatients?
2. What is the influence of gender on mental health help-seeking behaviors among mental health outpatients?
3. What is the influence of age on mental health help-seeking behaviors among mental health outpatients?
4. What are the contributions of clinical diagnosis, religious affiliation, marital status and educational qualification to mental health help-seeking behaviors among mental health outpatients?

### **Hypotheses**

The following hypotheses were tested in this research:

1. There will be a significant relationship between perceived stigmatization and mental health help-seeking behaviors among respondents.
2. There will be a significant gender difference in mental health help-seeking behaviors among respondents.
3. There will be a significant association between age and mental health help-seeking behaviors among respondents.
4. Clinical diagnosis, religious affiliation, marital status and educational qualification will be significant joint and independent predictors of mental health help-seeking behaviors among respondents.

## **METHODS**

### **Design**

Cross-sectional survey design was used to obtain data from the participants. The independent variables were perceived stigmatization and sociodemographic factors, whereas the dependent variable was mental health help-seeking behavior. To be enrolled in this study, willing

participants were required to be adults (18 years or greater) who is an outpatient registered as receiving treatment at the Federal Neuropsychiatric Hospital, Yaba, Lagos state, Nigeria. It was also required that willing participants could communicate (written & verbal) using English language because our instruments were available in English Language only. We also required that willing participants were in full or partial contact with reality. The second author who is a clinical psychologist was responsible for screening participants on the inclusion criteria.

### **Participants and Setting**

Accidental sampling technique was employed to select 42 participants in Federal Neuropsychiatric Hospital, Yaba, Lagos state, Nigeria. The hospital was established in 1907 and is among the oldest psychiatric facility in Nigeria. The high number of psychiatric patients with diverse demographics that are being managed in the hospital, justified our choice for selecting the Federal Neuropsychiatric Hospital, Yaba, Lagos state, Nigeria as our study setting.

The mean age of participants was  $27.03 \pm 7.05$  years. Of the total participants, 31 were males, whereas 11 were females. Their distribution by religious affiliation showed that, 26 were Christians, 14 identified with Islam, 1 identified with other religious affiliations, and 1 reported none. The marital status distribution showed that 32 were single, whereas 10 were married. The distribution by highest educational qualification showed that, 1 had primary school education, 10 had high school education, and 31 had attained education from tertiary institutions. The clinical diagnosis of participants showed that 3 were diagnosed of simple schizophrenia, 22 were diagnosed of substance induced schizophrenia, 2 were diagnosed of mania, 6 were diagnosed of depression, 3 were diagnosed of bipolar affective disorder, 1 was diagnosed of dependent personality disorder, 1 was diagnosed of paranoid schizophrenia, and 4 were diagnosed of anxiety disorders.

### **Measures**

The standardized questionnaire utilized in this study comprised: demographic data of the participants, questions relating to perceived stigmatization and mental health help-seeking behavior. Demographic variables included the sex, age, marital status, religious affiliation, highest education attained, and clinical diagnosis of the patient. The stigma scale for mental illness was used to measure the perceived stigmatization and this was developed by King, et al. (2007). This scale was purposely chosen for the fact that the authors have demonstrated the relevance of this scale in understanding the role of stigma of psychiatric illness in clinical research. It consists of 28 items. The scale is rated on a 5-point likert format, i.e. 0= strongly disagree, 1= disagree, 2= neither agree nor disagree, 3= agree, 4= strongly agree. The internal consistency of the stigma scale as reported by the scale authors was 0.87. We found an internal consistency of 0.85 as determined by Cronbach's alpha.

The mental health help-seeking behavior scale adopted from Egwuonwu, et al. (2019), consists of 10 items, and this was used to assess the mental health help-seeking behaviors of participants. Items were rated using bipolar format (Yes or No). Minimum possible score was 0 while maximum possible score was 10. A score of 50% or more was interpreted as good mental health help-seeking behavior whereas less than 50% was interpreted as poor mental health help-seeking behavior. An internal consistency of 0.78 was found in our study using Cronbach's alpha.

## Procedure

The first researcher prepared a letter of ethical approval request and proposal that was submitted by the third researcher to the Research and Ethics Committee of the hospital in order to obtain ethical approval. After approval was granted, data collection from participants was proceeded with, based on the willingness and availability of participants. Before data collection, all participants were briefed about the research purpose, they were assured of the confidentiality of their responses, and only those that consented were given a consent form to confirm their willingness to be involved in the study.

The third researcher was responsible for data collection, and the administration of questionnaires occurred weekly for about 1 month and 1 week. At the end of each week, questionnaires were retrieved from participants, and all participants were thanked for participating in the study. Out of 300 questionnaires that were printed, 50 questionnaires were administered and retrieved; however, 42 questionnaires were completed. The “limitations of study” section of this paper has addressed why 50 questionnaires could be administered. As part of the ethical consideration, the hospital management was informed that the outcome of the study would be communicated to them for policy action purpose. Finally, the IBM SPSS statistics (v. 22.0) was used for data analysis and statistical significance was set at  $p < .05$ .

## RESULTS

### Hypothesis 1

First hypothesis was stated that there will be a significant relationship between perceived stigmatization and mental health help-seeking behaviors among participants. This was tested using Pearson  $r$ .

**Table I**

*Summary table of Pearson  $r$  showing the relationship between perceived stigmatization and mental health help-seeking behavior.*

|      | 1     | 2    |
|------|-------|------|
| 1 PS | —     | —    |
| 2MHB | 0.12  | —    |
| Mean | 93.71 | 7.83 |
| SD   | 16.23 | 2.07 |

**PS = Perceived stigmatization**

**MHB = Mental health help-seeking behavior**

The above result showed that there was a positive relationship between perceived stigmatization and mental health help-seeking behavior at ( $r = 0.12$ ;  $df = 40$ ;  $p > 0.05$ ). However, the relationship was not significant. Therefore, the stated hypothesis that there will be significant relationship between perceived stigmatization and mental health help-seeking behavior is falsified in this study.

### Hypothesis 2

It was stated that there will be a significant gender difference in mental health help-seeking behaviors among participants. This was tested using independent sample t-test.

**Table II**  
*Summary of independent sample t-test table showing the gender differences in mental health help-seeking behavior*

| DV                                  | Group  | N  | Mean | SD   | t    | Df | P    |
|-------------------------------------|--------|----|------|------|------|----|------|
| Mental health help-seeking behavior | Male   | 31 | 7.97 | 2.12 | 7.28 | 40 | >.05 |
|                                     | Female | 11 | 7.45 | 1.97 |      |    |      |

From the above table, it is shown that male participants scored a higher mean score when compared with female counterparts on mental health help-seeking behavior. However, the difference was not significant as determined by independent sample t-test at [ $t(40) = 7.28$ ;  $p > .05$ ]. Consequently, the result falsifies the stated that there will be a significant gender difference in mental health help-seeking behaviors among participants.

### Hypothesis 3

Third hypothesis stated that there will be a significant association between age and mental health help-seeking behaviors among participants. This was tested below, using the Pearson  $r$ .

**Table III**  
*Summary table of Pearson  $r$  showing the relationship between age and mental health help-seeking behavior.*

|       | 1     | 2    |
|-------|-------|------|
| 1 Age | —     |      |
| 2MHB  | 0.26  | —    |
| Mean  | 27.03 | 7.83 |
| SD    | 7.05  | 2.07 |

### MHB = Mental health help-seeking behavior

The above result showed that there was a positive relationship between participants' age and mental health help-seeking behavior at ( $r = 0.26$ ;  $df = 40$ ;  $p > 0.05$ ). However, the relationship was not significant. Therefore, the stated hypothesis that there will be significant relationship between age and mental health help-seeking behavior is falsified in this study.

### Hypothesis 4

It was hypothesized that, diagnosis, religion, marital status and educational qualification will be significant joint and independent predictors of mental health help-seeking behaviors among participants.

**Table IV**  
**Summary of Multiple Regression Table, Showing the Independent and Joint Predictors of Mental Health Help-Seeking Behaviours.**

| Predictors                | B    | T     | P    | R   | R <sup>2</sup> | F    | P    |
|---------------------------|------|-------|------|-----|----------------|------|------|
| Clinical diagnosis        | .21  | 1.46  | >.05 |     |                |      |      |
| Religious affiliation     | -.37 | -2.47 | <.05 |     |                |      |      |
| Marital status            | -.19 | -1.24 | >.05 |     |                |      |      |
| Educational qualification | .07  | 0.46  | >.05 | .53 | .28            | 3.57 | <.05 |

Criterion variable = Mental health help-seeking behaviour

The above table showed that clinical diagnosis, religious affiliation, marital status and educational qualification had a significant joint prediction on mental health help-seeking behaviour ( $R = .53$ ;  $R^2 = .28$ ;  $F(4, 37) = 3.57$ ;  $p < .05$ ). Furthermore, it was observed that the predictor variables jointly accounted for 28% variance in mental health help-seeking behavior ( $R = .53$ ;  $R^2 = .28$ ), whereas other variables not considered in this study accounted for the remaining 72% variance.

The independent contribution of each predictor variable showed that of all the four (4) predictors, religious affiliation had a significant independent contribution on mental health help-seeking behavior at ( $\beta = -.37$ ,  $t = -2.47$ ;  $p < .05$ ), whereas other predictors (clinical diagnosis, marital status and educational qualification) did not have significant independent contributions. Given these, the stated hypothesis that; clinical diagnosis, religious affiliation, marital status and educational qualification will be significant joint and independent predictors of mental health help-seeking behaviors among participants is partly accepted in this study.

## DISCUSSION AND IMPLICATION

We conducted a cross-sectional study to determine some predictors of mental health help-seeking behaviors among psychiatric outpatients attending a psychiatric facility in Lagos, Nigeria. Our first finding showed that there was no significant relationship between perceived stigmatization and mental health help-seeking behavior. Second, we found that there was no significant gender difference in mental health help-seeking behavior. Third, we found that there was no significant relationship between age and mental health help-seeking behavior. Fourth, we found that clinical diagnosis, religious affiliation, marital status, and educational qualification had a significant joint prediction on mental health help-seeking behaviour, with 28% variance in mental health help-seeking behaviour explained by the predictors. In the same fourth finding, it was observed that of all the predictor variables, religious affiliation had a significant independent prediction on mental health help-seeking behaviour.

The implication of the above findings suggests that the biopsychosocial context such as clinical diagnosis, religion, marital status or educational qualification, of psychiatric outpatients play a very key role in explaining their mental health help-seeking behaviours. Such roles are that the biopsychosocial context of psychiatric outpatients could possibly strengthen or weaken their mental health help-seeking behaviours. Therefore, the biopsychosocial context of the study

population is worthy of attention during mental healthcare. The implication of our findings is in consensus with related studies that submitted that the psychological and sociocultural context of living in Black societies (e.g. Nigeria) where our current study was conducted can influence peoples' health-enhancing behaviours in relation to their mental health (e.g. Ogueji & Okoloba, 2020). Our first finding disagreed with related studies where perceived stigmatization was found to influence peoples' intention to seek mental health help (Sheikh, et al. 2015; Ogueji & Constantine-Simms, 2019). Our first finding also disagreed with the threats-to-self-esteem model that guided this study (Fisher, et al. 1983). In addition, the first finding contradicted the submissions from a sample of participants in England which showed that stigmatization influenced help-seeking for mental illness (Mantovani, et al. 2017). The second finding in our study disagreed with Olarenwaju, et al. (2019) who submitted that gender was a significant predictor of mental health help-seeking behavior. Our second finding also disagreed with the findings from an American survey which submitted that males were more likely than females to engage in health-enhancing behaviors in relation to mental health (Wendt & Shafer, 2015). On the other hand, the second finding was in consensus with Kumuyi (2017) who argued that gender was not a significant predictor of mental health help-seeking behaviors; and the consensus could be explained by the fact that the current study and Kumuyi (2017) study was conducted on a similar sample (i.e. psychiatric outpatients).

Furthermore, the third finding in our study disagreed with Oladipo and Blogun (2010) who found that age significantly predicted the mental health help-seeking behaviors of people. The third finding also disagreed with Mackenzie, et al. (2006) who found that age was associated with help-seeking for mental illness. On the other hand, our fourth finding was in collaboration with related studies where variables similar to clinical diagnosis, religious affiliation, marital status, and educational qualification were found to predict mental health help-seeking behaviours (Adewuya & Makanjuola 2008). Our fourth finding also supported a study by Ward et al. (2013) which found that the religion of African Americans impacted their mental health help-seeking behaviors. The agreement between our findings and the findings from other cultures (e.g. western worlds) suggest that our study has practical benefits for enhancing help-seeking for mental illness among the study population in other cultures. On the other hand, the disagreement between our findings and the findings from other cultures may suggest the impact of cultural differences, or the need for further studies that examines the reason for the disagreement.

From our findings, we recommend that intervention programs that are aimed at strengthening the mental health help-seeking behaviors of psychiatric outpatients should be cautious of the significant predictors identified in our study. Giving attention to the significant predictors reported in this study is expected to strengthen an interdisciplinary approach to mental health care because of the biological, psychological and sociocultural predictors of mental health help-seeking behaviors that were found in this study. Finally, our study is an extension of related studies because of the fact that related studies often found predictors of mental health help-seeking behaviors from a sociocultural perspective mostly (e.g. Mackenzie, et al. 2006; Wendt & Shafer, 2015; Kumuyi, 2017; Mantovani, et al. 2017; Ogueji & Constantne-Simms, 2019; Ogueji & Okoloba, 2020).



## **LIMITATIONS OF STUDY**

Our study could not access a large sample size because of the fact that most psychiatric outpatients in the study setting were not in stable mental health condition to complete the questionnaires when we conducted this study. Therefore, future studies can draw a large sample size from multiple psychiatric facilities simultaneously. Another limitation of study was the possibility of response bias from participants. Lastly, employing a qualitative study as a follow-up study to explore why religious affiliation significantly predicted mental health help-seeking behaviors might have expanded this study. Further efforts can thus help to address these limitations.

## **CONCLUSION AND FURTHER STUDIES**

We concluded that some significant predictors of mental health help-seeking behaviors among psychiatric outpatients has been identified by our study. Further research that strengthens an interdisciplinary approach to psychiatric care and enhances mental health-help seeking behaviors among psychiatric patients is needed.

## **ACKNOWLEDGEMENT**

To the participants for giving up their time to participate in this study, and to Saada, Gift, and Tayo for their supports on this study.

## **AUTHORS' CONTRIBUTION**

OIA – Conceptualization, data analysis, article writing (draft & original), proofreading and approval of final manuscript.

OTE – Conceptualization, data analysis, article writing (draft & original), proofreading, and approval of final manuscript.

GTN - Conceptualization, data collection, article writing (draft & original), proofreading, and approval of final manuscript.

## **CONFLICT OF INTEREST**

The authors have no conflict of interest to declare.

## **ETHICAL APPROVAL**

This study was approved by the Research and Ethics Committee of the Federal Neuropsychiatric Hospital, Yaba, Lagos state, Nigeria. Both written and verbal consents were used to obtain consent from participants and all participants consented that their data should be used for this research. Our study was conducted in accordance with the 1964 Helsinki ethical declaration, its higher standard or a comparable standard.

## FUNDING

The study was self-funded.

## DATA AVAILABILITY STATEMENT

The data that supports this study is available from the corresponding author upon reasonable request.

## References

- Adewuya, A., & Makanjuola, R. (2008). Social distance towards people with mental illness in Southwest Nigeria. *Australian and New Zealand Journal of Psychiatry* 42(5):389-95.
- Bitman-Heinrichs, R. L. (2017). From attitudes to intent to action: Predictors of psychological help-seeking behavior among clinically distressed adults. *Graduate Theses and Dissertations*, 16098.
- Chaudhry, M. A., Aneeqa, S., Butt, A., et al. (2017). Health seeking behavior of psychiatric patients at an outpatient department of a tertiary care hospital in Lahore. *Pakistan Journal of Health*, 7(3): 137-141.
- Coker, O., Olibamoyo, O., Adewunmi, A. O., Osakwe, V. A., Taiwo, T., & Alonge, A. O. (2019). Help-seeking behaviors of individuals with mental illness before pursuing professional mental health care services in Lagos, Nigeria. *International Journal of Advanced Community Medicine*, 2(1): 10-16.
- Dongxin, W., Jing, M., Lihong, T., et al. (2019). Characteristics of help-seeking behavior among bipolar disorder patients: A study in Hunan, China. *Medicine*, 98(46): 46-pe17687.
- Egwuonwu, C. C., Kamma-Okafor, O. J., Ogunyemi, A. O., et al. (2019). Depression-related knowledge, attitude, and help-seeking behavior among residents of Surulere Local Government area, Lagos state, Nigeria. *Journal of Clinical Sciences*, 16(2): 49-56.
- Fisher, et al. (1983). Recipient reactions to aid. *Psychological Bulletin*, 91: 27-54.
- Heydari, A., Yazd, A. M., & Soodmand, P. (2019). Explanation of the lived experiences of patients with psychiatric disorders on the consequences of stigma in mental health centers. DOI: 10.22038/ebcj.2019.37677.1987.
- Khiari, H., et al. (2019). Pathways to mental healthcare for patients with severe mental illness in Tunisia. *Pan African Medical Journal*, 34: 118.
- King M, Dinos S, Shaw J, et al. (2007). The stigma scale for mental illness. *Archives of General Psychiatry* 51(1): 8-19.
- Knack, S., Mantler, E. & Szeto, A. (2017). Mental illness-related stigma in healthcare. *Healthc Manage Forum*, 30(2): 111-116.
- Kodama, T., Syouji, H., Takaki, S., et al. (2016). Text messaging for psychiatric outpatients: Effect on help-seeking and self-harming behaviors. *Journal of Psychosocial Nursing and Mental Health Services*, 54(4): 31-37.

- Kumuyi, D. O. (2017). Personality traits, and religiosity as predictors of health seeking behaviors among out-patients of Federal Neuro-Psychiatric Hospital, Yaba Lagos. A Master's degree dissertation submitted to *the Department of Behavioral Studies, College of Management and Social Sciences, Redeemer's University, Ede Osun State, Nigeria*.
- Mackenzie, C. S., Gekoski, W. L., & Knox, V. J. (2006). Age, gender, and the underutilization of mental health services: The influence of help-seeking attitudes. *Aging & Mental Health, 10*(6): 574-582.
- Magaard, J. L., Seeralan, T., Schulz, H., & Brutt, A. L. (2017). Factors associated with help-seeking behavior among individuals with major depression: A systematic review. *PLOS ONE, 12*(5): e0176730.
- Makanjuola, V., Esan, V., Oladeji, B., et al. (2016). Explanatory model of psychosis: Impact on perception of self-stigma by patients in three sub-Saharan African cities. *Social Psychiatry and Psychiatric Epidemiology, 51*(12): 1645-1654.
- Mantovani, N., Pizzolati, M., & Edge, D. (2017). Exploring the relationship between stigma and help-seeking for mental illness in African-descended faith communities in the UK. *Health Expect. 20*(3): 373-384.
- Mojtabai, R., et al. (2016). Attitudes toward mental health help-seeking as predictors of future help-seeking behavior and use of mental health treatments. *Psychiatry Online*, <https://doi.org/10.1176/appi.ps.201500164>
- Ogueji, I. A., & Constantine-Simms, D. (2019). "Clinical Psychology in Nigeria: An Assessment of Perceptions of the Growing Subfield Among Non-Mental Health Professionals And Recommendations For Growth Acceleration." *IOSR Journal of Humanities and Social Science (IOSR-JHSS)*. vol. 24 no. 10, 2019, pp. 25-31 doi:10.9790/0837-2410122531.
- Ogueji, I. A., & Okoloba, M. M. (2020). Seeking professional help for mental illness: A cross-cultural mixed methods study of Black families in United Kingdom and Nigeria. (Under review).
- Oladipo, S. E., & Blogun, S. K. (2010). Age, extraversion, anxiety and marital status as factors of spiritual help-seeking behaviors of women in Ibadan metropolis. *Educational Research, vol. 1*(1): pp. 001-007.
- Olarenwaju, F. O., Ajayi, L. A., Loromeke, E., Olarenwaju, A., Allo, T., & Nwannebuife, O. (2019). Masculinity and men's health-seeking behaviors in Nigerian academia. *Cognet Social Sciences, 5*:1, DOI: 10.1080/23311886.2019.1682111.
- Sheikh, T. L., Adekeye, O., Olisah, V. O., & Mohammed, A. (2015). Stigmatization of mental illness among employees of a Northern Nigerian University. *Niger Med J. 2015 Jul-Aug; 56*(4):244-248.
- Shi, W., Shen, Z., Wang, S., & Hall, B. J. (2020). Barriers to professional mental health help-seeking among Chinese adults: A systematic review. *Front. Psychiatry, 11*: 442.
- Ward, E., Wiltshire, J. C., et al. (2013). African American men and women's attitude towards mental illness, perceptions of stigma, and preferred coping behaviors. *Nurs Res. 62*(3): 185-194.
- Wendt, D., & Shafer, K. (2015). Gender and attitudes about mental health help-seeking: Results from national data. *Health & Social Work, 41*(1): hlv089.
- Wigand, M. E., et al. (2019). Predictors of help-seeking in unemployed people with mental health problems. *International Journal of Social Psychiatry*, <https://doi.org/10.1177/0020764019868262>
